# Supplementary material for: PDE4 Gene Family Variants Are Associated with Response to Apremilast Treatment in Psoriasis
Source: MDPI journal article supplement (doi:10.3390/genes15030369), 2024-03-17
Supplement: s1 [file s1]

**Table S3:** eQTLs associated with the response to apremilast.

| Locus    | SNP        | P-value              | Effect size* | Tissue/Cells                      |
|----------|------------|----------------------|--------------|-----------------------------------|
| u. PDE4A | rs3745598  | 1.5x10 <sup>-2</sup> | -0.06        | monocyte_LPS                      |
| d. PDE4A | rs892085   | 1.3x10 <sup>-2</sup> | -0.28        | Tfh_memory                        |
|          | rs74942924 | 6.2x10 <sup>-3</sup> | 0.50         | macrophage_IFN $\gamma$           |
|          |            | 4.9x10 <sup>-3</sup> | 0.71         | macrophage_naive                  |
|          |            | 7.8x10 <sup>-4</sup> | -1.95        | Tfh_memory                        |
|          |            | 2.3x10 <sup>-2</sup> | -0.53        | Th1-17_memory                     |
|          |            | 4.2x10 <sup>-2</sup> | -0.68        | Th17_memory                       |
|          |            | 4.5x10 <sup>-2</sup> | 0.21         | skin                              |
|          | rs11085752 | 3.1x10 <sup>-2</sup> | 0.29         | CD8_T-cell_naive                  |
|          |            | 1.5x10 <sup>-2</sup> | 0.25         | Tfh_memory                        |
|          |            | 4.7x10 <sup>-2</sup> | 0.11         | Th17_memory                       |
|          | rs7935     | 5.9x10 <sup>-3</sup> | 0.37         | CD8_T-cell_naive                  |
|          |            | 1.9x10 <sup>-2</sup> | 0.23         | Tfh_memory                        |
|          |            | 7.2x10 <sup>-3</sup> | 0.15         | Th17_memory                       |
|          | rs12979813 | 4.7x10 <sup>-2</sup> | 0.04         | blood                             |
|          | rs420703   | 1.1x10 <sup>-2</sup> | 0.27         | Cells_EBV-transformed_lymphocytes |
|          |            | 4.5x10 <sup>-2</sup> | 0.04         | Skin_Sun_Exposed_Lower_leg        |
|          | rs322151   | 2.6x10 <sup>-2</sup> | 0.23         | Cells_EBV-transformed_lymphocytes |
|          | rs322144   | 2.9x10 <sup>-2</sup> | 0.36         | CD8_T-cell_naive                  |
|          | rs10424035 | 1.8x10 <sup>-2</sup> | 0.78         | Th1_memory                        |
| u. PDE4B | rs883824   | 4.3x10 <sup>-2</sup> | -0.09        | CD8_T-cell_anti-CD3-CD28          |
| PDE4B    | rs61799396 | 4.3x10 <sup>-2</sup> | 0.07         | Skin_Sun_Exposed_Lower_leg        |
|          |            | 3.1x10 <sup>-2</sup> | 0.14         | CD8_T-cell_naive                  |
|          |            | 4.8x10 <sup>-2</sup> | 0.15         | Tfh_memory                        |
|          |            | 6.6x10 <sup>-3</sup> | 0.19         | Th2_memory                        |
|          | rs1937457  | 2.6x10 <sup>-2</sup> | 0.06         | Skin_Sun_Exposed_Lower_leg        |
|          |            | 4.5x10 <sup>-2</sup> | 0.13         | Tfh_memory                        |
|          |            | 8.1x10 <sup>-3</sup> | 0.16         | Th2_memory                        |
|          | rs12757542 | 4.3x10 <sup>-2</sup> | 0.14         | Th2_memory                        |
|          |            | 2.5x10 <sup>-2</sup> | 0.08         | skin                              |
|          | rs12406476 | 3x10 <sup>-3</sup>   | -0.07        | Skin_Not_Sun_Exposed_Suprapubic   |
|          |            | 2.8x10 <sup>-2</sup> | -0.06        | monocyte_Pam3CSK4                 |
|          |            | 1.3x10 <sup>-3</sup> | 0.10         | CD8_T-cell_anti-CD3-CD28          |
|          |            | 2x10 <sup>-2</sup>   | 0.33         | NK-cell_naive                     |
|          |            | 4.6x10 <sup>-2</sup> | -0.08        | skin                              |
|          | rs12745871 | 4.3x10 <sup>-2</sup> | -0.04        | Whole_Blood                       |
|          |            | 5.5x10 <sup>-3</sup> | -0.11        | Skin                              |
|          |            | 8.1x10 <sup>-4</sup> | 0.12         | CD8_T-cell_anti-CD3-CD28          |
|          |            | 6.3x10 <sup>-5</sup> | -0.11        | Skin_Not_Sun_Exposed_Suprapubic   |
|          | rs2503174  | 4.4x10 <sup>-2</sup> | 0.08         | monocyte_naive                    |
|          |            | 6.3x10 <sup>-3</sup> | 0.14         | Th1_memory                        |
|          | rs2485381  | 4.8x10 <sup>-2</sup> | 0.12         | CD8_T-cell_naive                  |
|          |            | 3x10 <sup>-2</sup>   | 0.30         | NK-cell_naive                     |
|          |            | 6.9x10 <sup>-4</sup> | 0.18         | Th1_memory                        |
|          | rs1890196  | 5.6x10 <sup>-3</sup> | 0.07         | monocyte_LPS                      |

|           |             |                      |       |                                   |
|-----------|-------------|----------------------|-------|-----------------------------------|
|           |             | 3.1x10 <sup>-2</sup> | -0.07 | monocyte_Pam3CSK4                 |
|           |             | 3.2x10 <sup>-2</sup> | -0.05 | monocyte_R848                     |
|           |             | 4x10 <sup>-2</sup>   | -0.09 | Treg_memory                       |
| d. PDE4B  | rs11208847  | 4.9x10 <sup>-2</sup> | -0.08 | Th1-17_memory                     |
| u. PDE4C  | rs10423674  | 4x10 <sup>-2</sup>   | 0.21  | Cells_EBV-transformed_lymphocytes |
|           | rs2023878   | 1.2x10 <sup>-2</sup> | 0.35  | Cells_EBV-transformed_lymphocytes |
| PDE4D     | rs697076    | 4x10 <sup>-2</sup>   | -0.11 | LCL <sup>#</sup>                  |
|           |             | 3x10 <sup>-2</sup>   | 0.09  | monocyte_LPS                      |
|           |             | 4.5x10 <sup>-2</sup> | 0.09  | monocyte_Pam3CSK4                 |
|           |             | 2.2x10 <sup>-2</sup> | 0.19  | B-cell_naive                      |
|           | rs295943    | 2.5x10 <sup>-2</sup> | -0.16 | LCL                               |
|           | rs177077    | 2.3x10 <sup>-2</sup> | -0.18 | neutrophil                        |
|           |             | 2.3x10 <sup>-2</sup> | -0.12 | LCL                               |
|           | rs16890078  | 4.7x10 <sup>-2</sup> | -0.21 | neutrophil                        |
|           |             | 5.3x10 <sup>-3</sup> | -0.22 | monocyte_LPS                      |
|           |             | 4.3x10 <sup>-3</sup> | -0.24 | monocyte_Pam3CSK4                 |
|           | rs2963821   | 3.9x10 <sup>-2</sup> | 0.14  | monocyte                          |
|           |             | 2.6x10 <sup>-5</sup> | 0.25  | neutrophil                        |
| CYP3A4    | rs35599367  | 1.9x10 <sup>-2</sup> | -0.36 | Liver                             |
| u. CYP3A4 | rs117406702 | 1.5x10 <sup>-2</sup> | -0.25 | Small_Intestine_Terminal_Ileum    |
| ANRIL     | rs1063192   | 1.7x10 <sup>-2</sup> | -0.13 | monocyte_Pam3CSK4                 |
|           | rs10120688  | 1.6x10 <sup>-2</sup> | -0.17 | LCL                               |
|           |             | 2.8x10 <sup>-2</sup> | 0.08  | B-cell_naive                      |
| LINC00941 | rs12297445  | 2x10 <sup>-5</sup>   | -0.36 | Skin_Sun_Exposed_Lower_leg        |
| AKAP6     | rs2031106   | 3.3x10 <sup>-2</sup> | -0.10 | Skin_Not_Sun_Exposed_Suprapubic   |
|           |             | 3.8x10 <sup>-2</sup> | -0.32 | macrophage_Listeria               |
|           |             | 2.7x10 <sup>-2</sup> | 0.38  | CD8_T-cell_anti-CD3-CD28          |
|           | rs11624518  | 2.1x10 <sup>-4</sup> | -0.65 | macrophage_IFNg                   |
|           |             | 2.2x10 <sup>-5</sup> | -0.53 | macrophage_naive                  |
|           |             | 2.9x10 <sup>-3</sup> | -0.36 | macrophage_Salmonella             |
|           |             | 2x10 <sup>-2</sup>   | -0.35 | macrophage_Listeria               |
|           |             | 3.3x10 <sup>-2</sup> | 0.30  | CD8_T-cell_anti-CD3-CD28          |
| APP       | rs380417    | 4.8x10 <sup>-2</sup> | 0.08  | neutrophil                        |
|           |             | 3.1x10 <sup>-2</sup> | -0.05 | CD4_T-cell_anti-CD3-CD28          |
|           | rs2829981   | 4.5x10 <sup>-2</sup> | -0.07 | monocyte                          |
|           |             | 2.1x10 <sup>-2</sup> | -0.09 | Skin_Not_Sun_Exposed_Suprapubic   |
|           |             | 4.0x10 <sup>-2</sup> | -0.07 | Whole_Blood                       |
|           | rs1783024   | 3.2x10 <sup>-2</sup> | -0.08 | neutrophil                        |
|           |             | 1.9x10 <sup>-3</sup> | -0.14 | Treg_memory                       |
|           |             | 2.0x10 <sup>-2</sup> | -0.07 | Treg_naive                        |
|           | rs128648    | 1.6x10 <sup>-2</sup> | -0.06 | monocyte                          |
|           |             | 2.7x10 <sup>-3</sup> | -0.12 | neutrophil                        |
|           |             | 2.9x10 <sup>-2</sup> | -0.06 | Skin_Not_Sun_Exposed_Suprapubic   |
|           |             | 2.8x10 <sup>-2</sup> | -0.06 | Whole_Blood                       |
|           |             | 1.6x10 <sup>-2</sup> | -0.07 | monocyte_IAV                      |
|           | rs58908134  | 1.7x10 <sup>-5</sup> | -0.11 | monocyte                          |
|           |             | 1.3x10 <sup>-7</sup> | -0.23 | neutrophil                        |
|           |             | 8.0x10 <sup>-5</sup> | -0.12 | Whole_Blood                       |
|           |             | 3.6x10 <sup>-4</sup> | -0.06 | blood                             |
|           |             | 4.0x10 <sup>-2</sup> | -0.07 | monocyte_IAV                      |
|           |             | 1.6x10 <sup>-2</sup> | -0.09 | Treg_naive                        |

|        |            |                       |       |                                 |
|--------|------------|-----------------------|-------|---------------------------------|
| SHANK2 | rs35961474 | 3.9x10 <sup>-2</sup>  | 0.69  | LCL                             |
| ITSN1  | rs2251854  | 5.2x10 <sup>-21</sup> | 0.47  | monocyte                        |
|        |            | 4.1x10 <sup>-12</sup> | -0.24 | Skin_Not_Sun_Exposed_Suprapubic |
|        |            | 6.1x10 <sup>-9</sup>  | -0.18 | Skin_Sun_Exposed_Lower_leg      |
|        |            | 1.0x10 <sup>-19</sup> | 0.26  | Whole_Blood                     |
|        |            | 2.1x10 <sup>-33</sup> | 0.28  | blood                           |
|        |            | 5.8x10 <sup>-3</sup>  | 0.10  | monocyte_IAV                    |
|        |            | 2.8x10 <sup>-6</sup>  | 0.22  | monocyte_LPS                    |
|        |            | 4.8x10 <sup>-4</sup>  | 0.14  | monocyte_naive                  |
|        |            | 3.8x10 <sup>-5</sup>  | 0.17  | monocyte_Pam3CSK4               |
|        |            | 5.1x10 <sup>-4</sup>  | 0.18  | monocyte_R848                   |
|        |            | 3.6x10 <sup>-2</sup>  | -0.13 | CD4_T-cell_anti-CD3-CD28        |
|        |            | 1.9x10 <sup>-9</sup>  | 0.21  | monocyte_CD16_naive             |
|        |            | 2.3x10 <sup>-5</sup>  | -0.07 | skin                            |
|        | rs2256797  | 3.2x10 <sup>-8</sup>  | -0.32 | monocyte                        |
|        |            | 4.5x10 <sup>-4</sup>  | 0.15  | Skin_Not_Sun_Exposed_Suprapubic |
|        |            | 2.3x10 <sup>-3</sup>  | 0.12  | Skin_Sun_Exposed_Lower_leg      |
|        |            | 3.7x10 <sup>-12</sup> | -0.24 | Whole_Blood                     |
|        |            | 1.4x10 <sup>-7</sup>  | -0.15 | blood                           |
|        |            | 5.8x10 <sup>-3</sup>  | -0.16 | monocyte_LPS                    |
|        |            | 2.2x10 <sup>-2</sup>  | -0.10 | monocyte_naive                  |
|        |            | 2.4x10 <sup>-4</sup>  | -0.17 | monocyte_Pam3CSK4               |
|        |            | 9.7x10 <sup>-4</sup>  | -0.20 | monocyte_R848                   |
|        |            | 1.7x10 <sup>-4</sup>  | -0.15 | monocyte_CD16_naive             |
|        |            | 2.3x10 <sup>-3</sup>  | 0.06  | skin                            |
|        | rs2834269  | 9.1x10 <sup>-3</sup>  | 0.09  | Skin_Not_Sun_Exposed_Suprapubic |
|        |            | 2.8x10 <sup>-2</sup>  | -0.23 | Treg_naive                      |
|        | rs2834287  | 1.8x10 <sup>-2</sup>  | 0.23  | Th17_memory                     |
|        |            | 4.5x10 <sup>-2</sup>  | -0.27 | Th1_memory                      |
|        |            | 4.6x10 <sup>-2</sup>  | 0.04  | skin                            |
| PIK3R1 | rs831122   | 2.7x10 <sup>-2</sup>  | -0.11 | monocyte_IAV                    |
|        |            | 4.7x10 <sup>-2</sup>  | -0.12 | monocyte_LPS                    |
|        |            | 4.2x10 <sup>-2</sup>  | -0.13 | monocyte_Pam3CSK4               |
|        |            | 5.7x10 <sup>-3</sup>  | 0.07  | skin                            |
| AKAP12 | rs10499266 | 1.5x10 <sup>-2</sup>  | -0.70 | Th2_memory                      |
|        | rs9397389  | 1.0x10 <sup>-2</sup>  | -0.37 | macrophage_Salmonella           |
|        |            | 2.7x10 <sup>-2</sup>  | 0.27  | LCL                             |
| MEOX2  | rs10270030 | 2.8x10 <sup>-2</sup>  | -0.05 | Skin_Not_Sun_Exposed_Suprapubic |
| ABL1   | rs75764711 | 1.3x10 <sup>-2</sup>  | -0.14 | monocyte                        |
|        |            | 4.2x10 <sup>-3</sup>  | -0.20 | Skin_Sun_Exposed_Lower_leg      |
|        |            | 4.5x10 <sup>-2</sup>  | -0.13 | Whole_Blood                     |
|        |            | 9.1x10 <sup>-4</sup>  | -0.07 | blood                           |
|        |            | 3.0x10 <sup>-2</sup>  | -0.14 | monocyte_LPS                    |
| ARRB1  | rs512797   | 1.2x10 <sup>-2</sup>  | 0.14  | macrophage_Listeria             |
|        |            | 4.4x10 <sup>-2</sup>  | 0.11  | CD4_T-cell_anti-CD3-CD28        |
|        |            | 6.2x10 <sup>-3</sup>  | 0.14  | CD4_T-cell_naive                |
|        |            | 3.7x10 <sup>-2</sup>  | 0.17  | CD8_T-cell_anti-CD3-CD28        |
|        |            | 1.3x10 <sup>-2</sup>  | 0.11  | CD8_T-cell_naive                |
|        |            | 1.8x10 <sup>-2</sup>  | 0.12  | Treg_naive                      |
|        | rs616714   | 4.3x10 <sup>-4</sup>  | -0.10 | T-cell                          |
|        |            | 3.2x10 <sup>-2</sup>  | 0.09  | Skin_Sun_Exposed_Lower_leg      |

|               |            |                       |       |                                 |
|---------------|------------|-----------------------|-------|---------------------------------|
|               |            | 1.4x10 <sup>-2</sup>  | -0.09 | CD4_T-cell_naive                |
|               |            | 6.9x10 <sup>-3</sup>  | -0.11 | CD8_T-cell_anti-CD3-CD28        |
|               |            | 3.5x10 <sup>-3</sup>  | -0.11 | Th1-17_memory                   |
|               |            | 6.9x10 <sup>-3</sup>  | -0.09 | Th17_memory                     |
| KLRK1         | rs2617151  | 2.4x10 <sup>-2</sup>  | 0.28  | T-cell                          |
|               |            | 3.5x10 <sup>-2</sup>  | 0.11  | Skin_Not_Sun_Exposed_Suprapubic |
|               |            | 5.6x10 <sup>-4</sup>  | 0.06  | Whole_Blood                     |
|               |            | 9.2x10 <sup>-29</sup> | 0.50  | blood                           |
|               |            | 4.2x10 <sup>-2</sup>  | -0.64 | B-cell_naive                    |
|               |            | 2.0x10 <sup>-4</sup>  | 0.20  | CD8_T-cell_anti-CD3-CD28        |
|               |            | 1.5x10 <sup>-8</sup>  | 0.44  | CD8_T-cell_naive                |
|               |            | 4.7x10 <sup>-8</sup>  | 0.46  | NK-cell_naive                   |
|               |            | 4.1x10 <sup>-3</sup>  | 0.19  | skin                            |
| ZBTB1         | rs74056445 | 4.7x10 <sup>-2</sup>  | -0.14 | macrophage_Salmonella           |
|               |            | 9.5x10 <sup>-3</sup>  | -0.07 | monocyte                        |
|               |            | 9.2x10 <sup>-3</sup>  | -0.12 | Skin_Not_Sun_Exposed_Suprapubic |
|               |            | 2.7x10 <sup>-3</sup>  | -0.14 | Skin_Sun_Exposed_Lower_leg      |
| CREBBP (CBP)  | rs2239316  | 5.1x10 <sup>-3</sup>  | 0.03  | blood                           |
| ATF1          | rs1129406  | 2.6x10 <sup>-9</sup>  | -0.14 | monocyte                        |
|               |            | 2.4x10 <sup>-12</sup> | -0.27 | neutrophil                      |
|               |            | 9.5x10 <sup>-4</sup>  | -0.04 | T-cell                          |
|               |            | 4.1x10 <sup>-5</sup>  | 0.09  | Skin_Not_Sun_Exposed_Suprapubic |
|               |            | 2.0x10 <sup>-11</sup> | 0.16  | Skin_Sun_Exposed_Lower_leg      |
|               |            | 2.5x10 <sup>-3</sup>  | -0.08 | Whole_Blood                     |
|               |            | 1.6x10 <sup>-4</sup>  | -0.06 | blood                           |
|               |            | 8.0x10 <sup>-3</sup>  | -0.04 | monocyte_IAV                    |
|               |            | 7.3x10 <sup>-3</sup>  | -0.06 | B-cell_naive                    |
|               |            | 1.5x10 <sup>-2</sup>  | -0.05 | Tfh_memory                      |
|               |            | 3.2x10 <sup>-3</sup>  | 0.06  | skin                            |
| IKBA (NFKBIA) | rs696      | 7.3x10 <sup>-3</sup>  | 0.10  | CD8_T-cell_anti-CD3-CD28        |

Note: d./u.: downstream of/upstream of; \*: positive and negative effect sizes refer to the increase and reduction of gene expression respectively; #LCL: EBV transformed lymphoblastoid B-cell lines.
